# Supplementary material for: Thgraphene: a novel two-dimensional carbon allotrope as a potential multifunctional material for electrochemical water splitting and potassium-ion batteries
Source: Royal Society of Chemistry journal article supplement (doi:10.1039/d2ta00547f), 2022-01-01
Supplement: d2ta00547f1.pdf [file d2ta00547f1.pdf]

## Thgraphene: a novel two-dimensional carbon allotrope as potential multifunctional material for electrochemical overall water splitting and potassium-ion batteries

Weiyi Wang,<sup>1</sup> Jie Meng,<sup>1</sup> Yujie Hu,<sup>1</sup> Jiajun Wang,<sup>2,\*</sup> Qunxiang Li,<sup>1,†</sup> and Jinlong Yang<sup>1</sup>

<sup>1</sup>*Hefei National Laboratory for Physical Sciences at the Microscale & Synergetic Innovation Center of Quantum Information and Quantum Physics, University of Science and Technology of China, Hefei, Anhui 230026, China.*

<sup>2</sup>*Tianjin Key Laboratory of Structure and Performance for Functional Molecules; College of Chemistry, Tianjin Normal University, Tianjin 300387, China.*

(Dated: March 10, 2022)

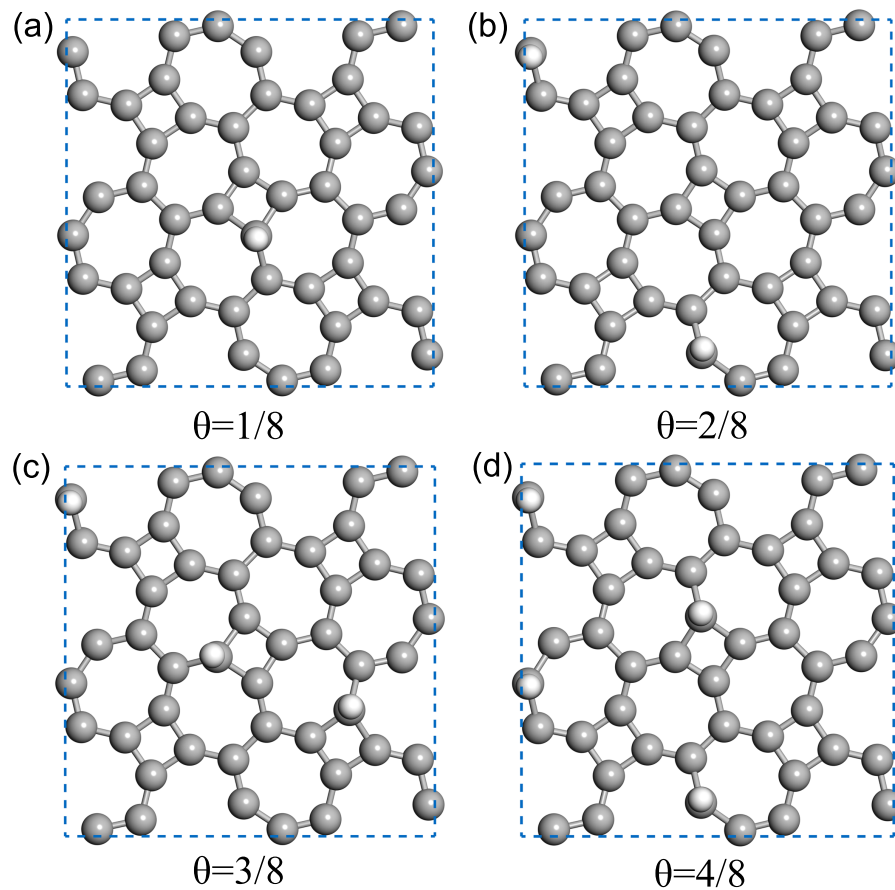

Fig. S1: (a-d) Optimized adsorption configurations of different hydrogen coverages  $\theta$  on thgraphene.

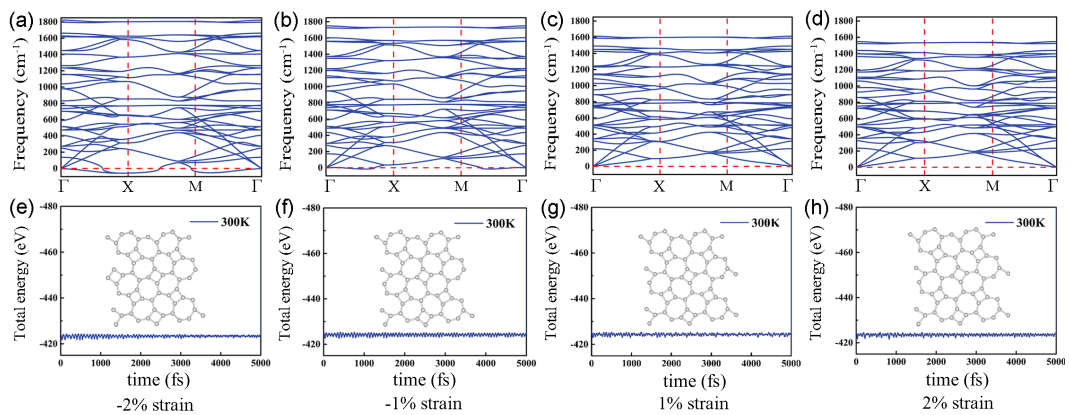

Fig. S2: Phonon dispersion (up panels) and energy fluctuation (down panels) curves of thgraphene at the strains of -2%, -1%, 1%, and 2%.

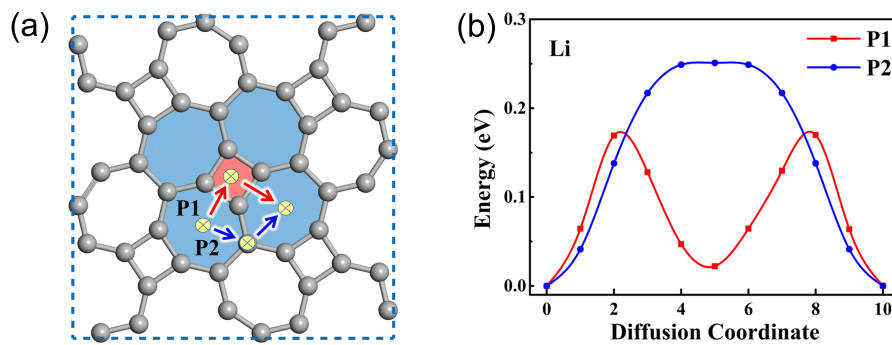

Fig. S3: (a) The illustration of possible ion diffusion paths for Li on thgraphene. (b) Corresponding ion diffusion profiles for Li.

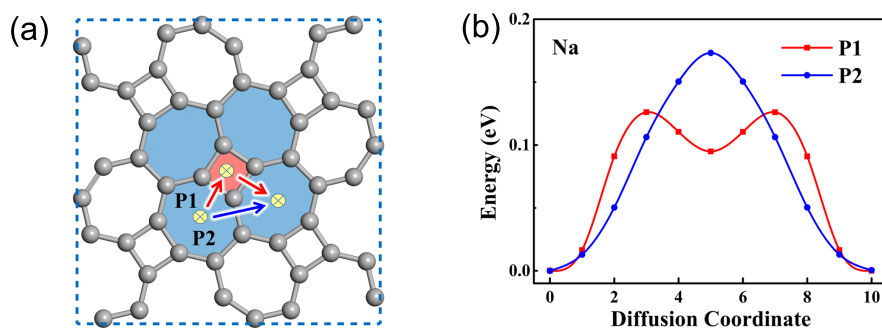

Fig. S4: (a) The illustration of possible ion diffusion paths for Na on thgraphene. (b) Corresponding ion diffusion profiles for Na.

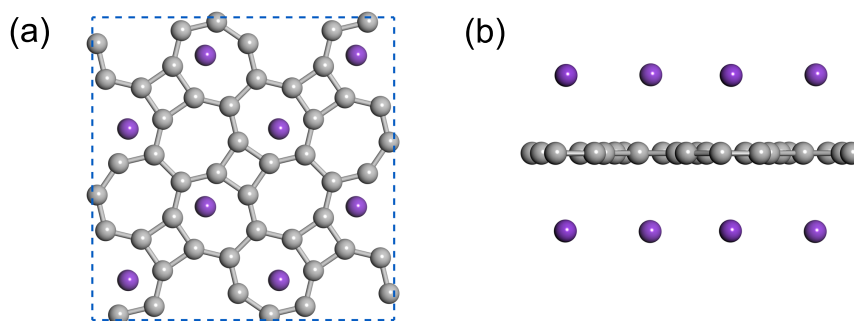

Fig. S5: (a-b) Top and side views of the optimized structure of K atoms adsorbed on thgraphene, gray and purple balls represent C and K atoms, respectively.
